# Supplementary material for: A1C Variability as an Independent Risk Factor for Microalbuminuria in Young People With Type 1 Diabetes
Source: Oxford University Press journal article supplement (doi:10.2337/dc10-2028), 2011-02-19
Supplement: dc102028supplementarydata.pdf [file dc102028supplementarydata.pdf]

SUPPLEMENTARY DATA

**Supplementary Table 1. Clinical and biochemical characteristics of the study population**

|                                                  | <b>All</b>       | <b>Microalbuminuria positive group</b> | <b>Normoalbuminuric group</b> |
|--------------------------------------------------|------------------|----------------------------------------|-------------------------------|
| <b>N (males)</b>                                 | 1232 (683)       | 1005 (129)                             | 227 (98)                      |
| <b>Age at diagnosis (yr)</b>                     | 9.2 [5.7-11.7]   | 9.4 [6.1-11.8]                         | 9.2 [5.6-11.6]                |
| <b>Age at last assessment (yr)</b>               | 17.4 [15.5-19.4] | 18.2 [16.3-20.4]                       | 17.2 [15.2-19.2]              |
| <b>Diabetes duration at last assessment (yr)</b> | 8.6 [5.6-11.6]   | 9.3 [6.5-12.4]                         | 8.2 [5.4-11.5]                |
| <b>Duration at MA onset (yr)</b>                 | -----            | 6.5 [4.1-9.1]                          | -----                         |
| <b>Number of A1C assessments</b>                 | 4 [3-6]          | 6 [4-8]                                | 4 [3-6]                       |
| <b>Mean A1c (%)</b>                              | 9.5              | 10.3                                   | 9.4                           |
| <b>A1C variability</b>                           | 1.05             | 1.3                                    | 1.0                           |
| <b>Adjusted A1C variability</b>                  | 0.91             | 1.1                                    | 0.86                          |
